# Supplementary material
Source: PubMed Central journal article supplement (PMC8249502)
Supplement: 13197_2020_4816_MOESM3_ESM.pdf [file 13197_2020_4816_MOESM3_ESM.pdf]

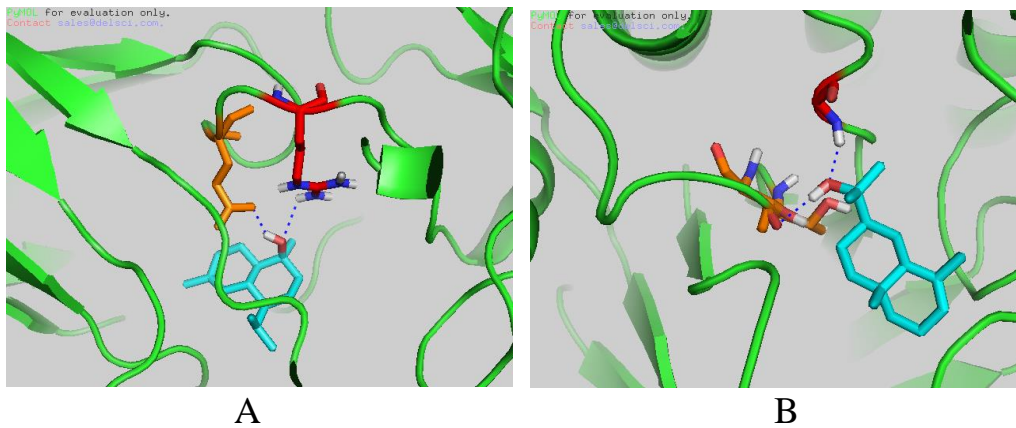

Fig S3. Binding mode of two essential oils docked into the catalytic pocket of beta-amylase enzyme (ID: 1vem):

- A- Cedrelanol (cyan) and its intermolecular hydrogen bonds (blue dashed line) with Glu 172 (orange) and Arg 174 (red).
- B- Alpha-eudesmol (cyan) and its intermolecular hydrogen bonds (blue dashed line) with Gly 290 (red) and Thr 330 (orange).
